# Supplementary material
Source: PubMed Central journal article supplement (PMC4111238)
Supplement: NIHMS599982-supplement-Suppl.pdf [file NIHMS599982-supplement-Suppl.pdf]

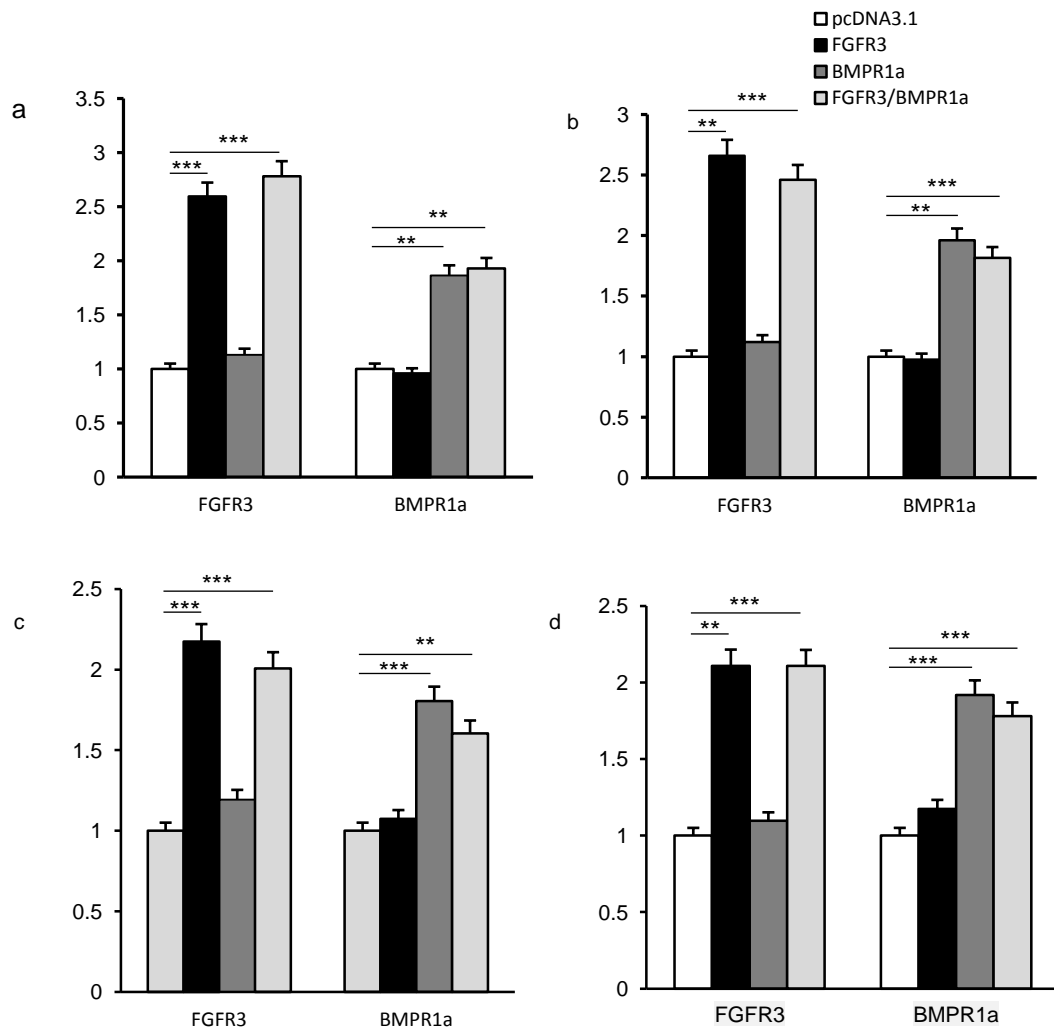

Supplementary Figure 1 : a,b The mRNA levels of FGFR3 and BMPR1a in the early stage (3 days, a) or later stage (7 days, b) of chondrocyte differentiation from mesenchymal cells (n=3, two-way ANOVA, \*\* p<0.01, \*\*\* p<0.001 ). c,d The mRNA levels of FGFR3 and BMPR1a in the early stage in the early stage (3 days, c) or later stage (7 days, d) of chondrocyte differentiation in precursor chondrocytes(n=3, two-way ANOVA, \*\* p<0.01, \*\*\* p<0.001).

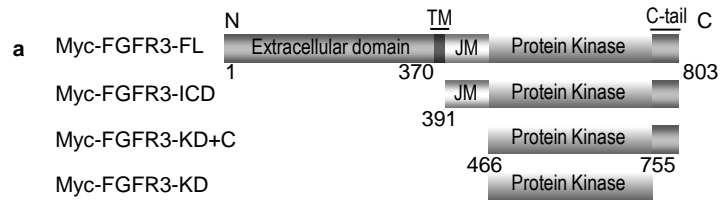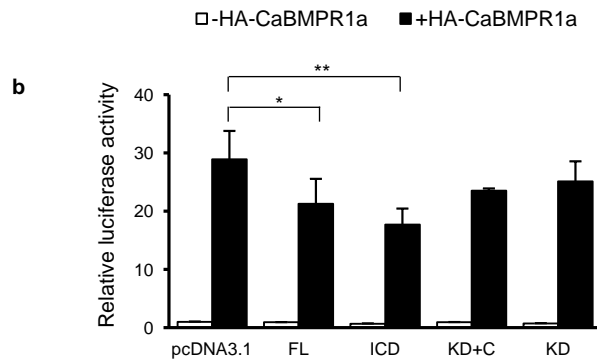

Supplementary Figure 2 : **a** Different functional domains of FGFR3 (FL, full length; ICD, intracellular domain; JM, juxtamembrane domain; KD, kinase domain) are schematically illustrated. **b** Deficiency of JM domain of FGFR3 abolished the inhibitory effects of FGFR3 on the Ca-BMPR1a activated Smad-transcriptional activity. Luciferase assays were performed as described above (n=3). \* p<0.05, \*\* p<0.01).
